# Supplementary material
Source: publisher site journal article supplement (https://www.dovepress.com/article/462895)
Supplement: Supplementary file 1 [file get_supplementary_file.php]

Supplementary Materials

**This file includes:**

Figures S1 to S3

Tables S1 to S3

Appendix 1

**
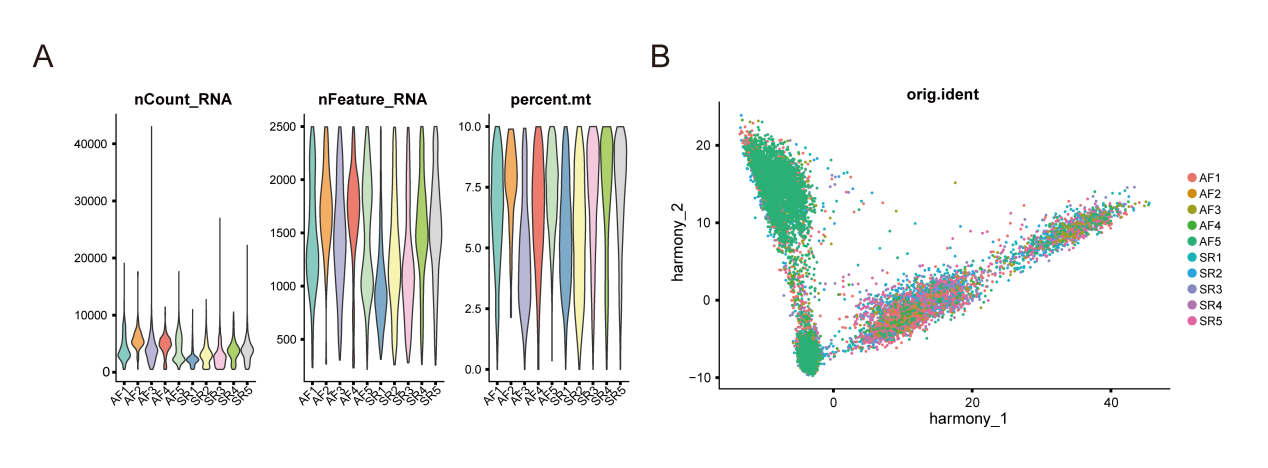
**

**Figures S1 Heterogeneity of immune cells in the AF and SR groups.** (A) Violin plot showing the quality control results for the scRNA-seq data. n_Count represents the number of molecules in each cell, n_Feature represents the number of genes in each cell, and Percent.mt represents the proportion of mitochondrial genes in each sample. (B) Harmony analysis to remove batch effects.

**
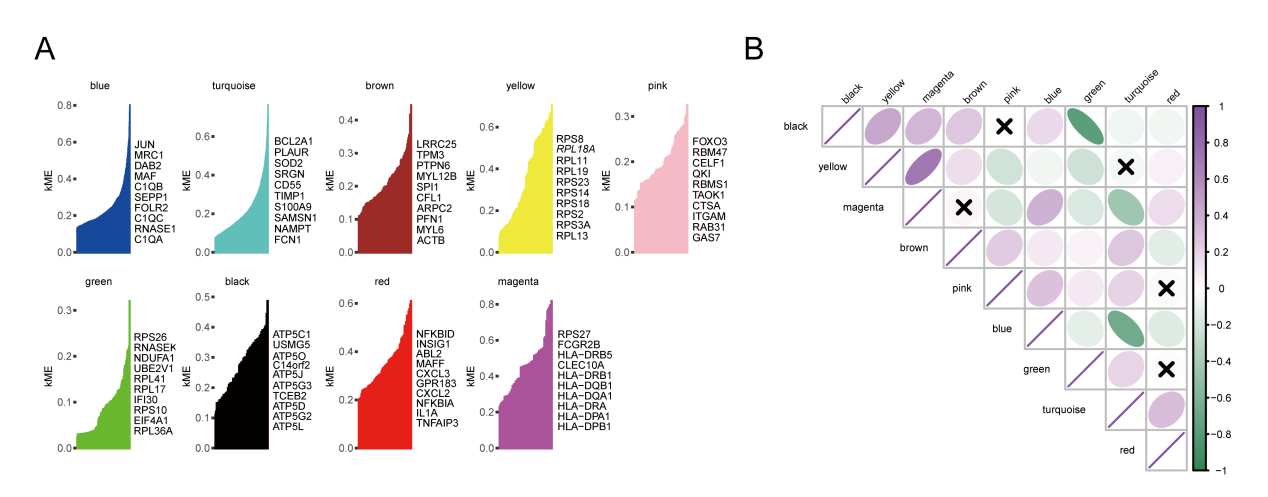
**

**Figures S2 hdWGCNA identifies the modular signature genes of macrophage subsets in AF.** (A) kME map showing the top 10 hub genes in each module ranked by kME across the macrophages. (B) Matrix plot showing the correlation between the intermodule. kME, eigengene‐based connectivity.


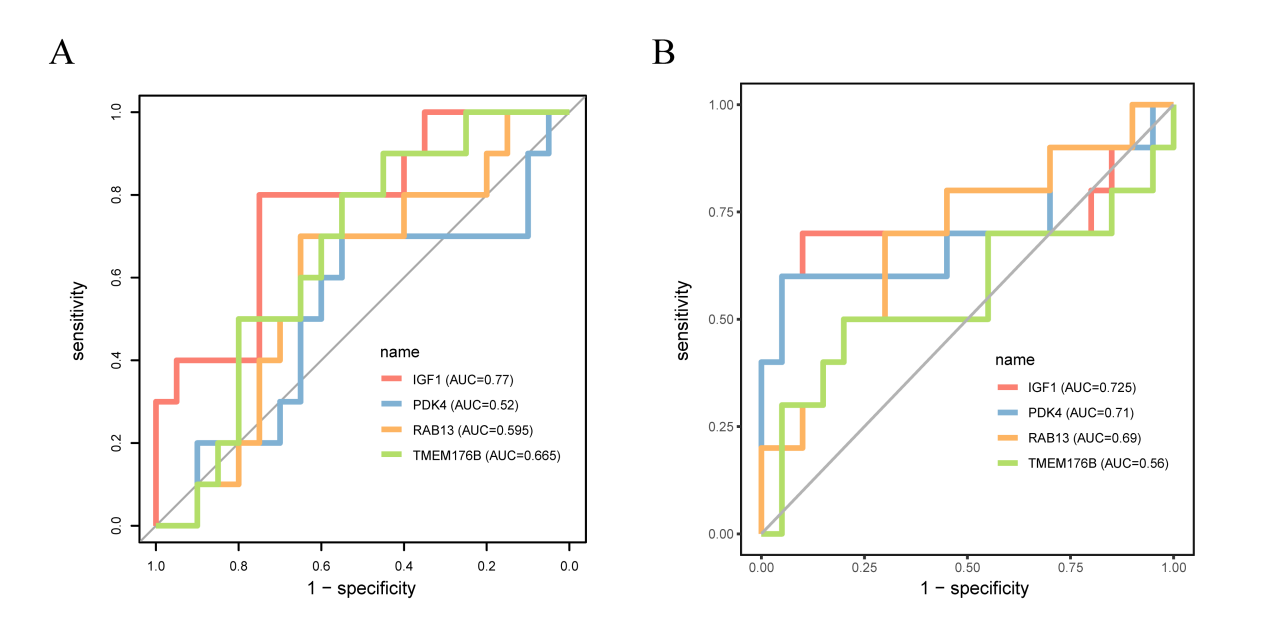


**Figures S3 Validating model stability using external datasets GSE2240.** Data from the GPL96 platform (A) and the GPL97 platform (B) were used to validate the predictive efficacy of the four key genes, as shown by the ROC curves.

**Table S1** Available datasets from the GEO

| Dataset | Platform | Organism | samples | Atrial fibrillation | Sinus rhythm |
| --- | --- | --- | --- | --- | --- |
| GSE14975 | GPL570 | Homo sapiens | Left atrial appendage | 5 | 5 |
| GSE31821 | GPL570 | Homo sapiens | Left atrial appendage | 2 | 2 |
| GSE79768 | GPL570 | Homo sapiens | Left atrial appendage | 7 | 6 |
| GSE41177 | GPL570 | Homo sapiens | Left atrial appendage | 16 | 3 |
| GSE115574 | GPL570 | Homo sapiens | Left atrial appendage | 14 | 15 |

**Table S2** Characteristics of SR and AF patients

| Characteristic | AF (n=6) | SR (n=6) | *P*-value |
| --- | --- | --- | --- |
| Gender (n,%) |  |  | 1 |
| Female | 4 ( 66.7) | 3 ( 50.0) |  |
| Male | 2 ( 33.3) | 3 ( 50.0) |  |
| Age (year),  mean (SD) | 74.50 (11.26) | 73.17 (12.38) | 0.849 |
| BMI (kg/m2),  mean (SD) | 20.98 (2.50) | 23.98 (3.54) | 0.121 |
| Smoking (n,%) |  |  | 1 |
| NO | 4 ( 66.7) | 3 ( 50.0) |  |
| YES | 2 ( 33.3) | 3 ( 50.0) |  |
| Alcohol (n,%) |  |  | 1 |
| NO | 5 ( 83.3) | 5 ( 83.3) |  |
| YES | 1 ( 16.7) | 1 ( 16.7) |  |
| History of hypertension (n,%) |  |  | 0.083 |
| NO | 5 ( 83.3) | 1 ( 16.7) |  |
| YES | 1 ( 16.7) | 5 ( 83.3) |  |
| History of CHD (n,%) |  |  | 0.083 |
| NO | 1 ( 16.7) | 5 ( 83.3) |  |
| YES | 5 ( 83.3) | 1 ( 16.7) |  |
| History of diabetes (n,%) |  |  | 1 |
| NO | 5 ( 83.3) | 5 ( 83.3) |  |
| YES | 1 ( 16.7) | 1 ( 16.7) |  |
| History of CVA (n,%) |  |  | 1 |
| NO | 4 ( 66.7) | 5 ( 83.3) |  |
| YES | 2 ( 33.3) | 1 ( 16.7) |  |
| WBC (109/L), median [IQR] | 6.24 [5.23, 8.96] | 5.30 [4.52, 5.88] | 0.2 |
| RBC (109/L), mean (SD) | 4.82 (0.93) | 4.83 (0.26) | 0.974 |
| Platelet (10 9/L), mean (SD) | 170.00 (58.65) | 250.33 (63.52) | 0.046 |
| D-dimer (ng/ml), mean (SD) | 2.02 (0.91) | 1.02 (0.43) | 0.036 |
| UA (umol/L), mean ± SD | 494.83 (115.83) | 382.83 (127.01) | 0.142 |
| Scr (μmol/L), median [IQR] | 106.00 [86.75, 112.50] | 81.00 [60.75, 90.00] | 0.078 |
| TG (mmol/L), mean (SD) | 1.05 (0.46) | 1.33 (0.51) | 0.349 |
| LDLC (mmol/L), mean (SD) | 1.93 [1.28, 2.54] | 2.38 [1.54, 3.19] | 0.229 |
| NT-proBNP (pg/ml),  median [IQR] | 7553.50[2202.00,1787975] | 216.00 [136.50, 286.50] | 0.016 |
| LVEF (%),  mean (SD) | 63.83 (5.64) | 63.83 (9.24) | 1 |
| LAD(mm), mean(SD) | 39.83 (2.86) | 35.83 (6.62) | 0.204 |
| LVEDD(mm),  mean(SD) | 43.33 (8.85) | 47.33 (12.61) | 0.539 |

Abbreviations: SD，standard deviation； BMI, body mass index; CHD, coronary heart disease; CVA, cerebrovascular accident; WBC, white blood cell; IQR, interquartile range; RBC, red blood cell; UA, uric acid; TG, triglyceride; LDLC, low-density lipoprotein cholesterol; NT-proBNP, N-terminal pro-brain；LVEF, left ventricular ejection fraction; LAD, left atrial internal diameter; LVEDD, left ventricular end-diastolic internal diameter.

**Table S3** Primer sequences

| Gene | Forward(5ʹ-3ʹ) | Reverse(5ʹ-3ʹ) |
| --- | --- | --- |
| IGF1 | GATAGAGCCTGCGCAATGGA | ACTGAAGAGCATCCACCAGC |
| PDK4 | AGAGGTGGAGCATTTCTCGC | GCTTTCTGGTCATCTGGGCT |
| TMEM176B | AAGATCTGCTCTGTCCCCCTC | TGTTTTGCGTCATCCTGCCT |
| RAB13 | GACAGGAAGAGTCTCACGACA | GGCCAAACTTGGCACTAGGA |
| β-actin | CCCTGGACTTCGAGCAAGAG | AATGCCAGGGTACATGGTGG |

**Appendix 1** The Informed Consent Form

**Informed consent**

**Information for Subjects**

Honourable :

You are invited to participate in the study "Exploring the macrophage-endothelial cell interaction pattern and potential signalling pathways in fibrosis of the left atrial appendage fibrillation based on single-cell multi-omics data" by Prof Tao Siming, which is undertaken by the Affiliated Hospital of Yunnan University under the "High-level Talent Cultivation and Supporting Programme" of Yunnan Province, under the Special Fund Grant No. YNWR-MY-2020-024. This information note provides you with some information to help you decide whether or not to participate in this scientific research. Please read it carefully and ask the investigator in charge of the study if you have any questions.

**Your participation in this study is voluntary and you have the right to refuse to participate. Whether you participate in this study or not, it will not have any effect on your course of treatment at our hospital.** This study has been reviewed by the Ethical Review Committee of Yunnan University Hospital.

1. **Why this study was undertaken: (please provide a brief summary of the background, purpose and significance of the study)**

Atrial fibrillation is is a major public health organisation problem, with incidence and harm increasing significantly with age, and the incidence of ischaemic stroke and peripheral vascular embolism is significantly increased in patients with AF, but there is no effective means of prevention of AF, and curative treatments for atrial fibrillation are less effective. There is increasing evidence that atrial fibrosis is a hallmark of structural remodelling and is considered to underlie the progression of AF. left atrial appendage fibrosis is a complex process that involves information transfer and transformational processes between various cells, and it is urgent and necessary to investigate the extent of left atrial appendage fibrosis during AF at the cellular level in relation to thrombus formation and development, as well as the underlying molecular mechanisms, to ameliorate the It is of great significance to improve the long-term poor prognosis after atrial fibrillation.

1. **What are the main elements of this study: (please provide a brief summary of the study population, timeframe of the study, subject population, sample size, exclusion criteria, methodology, and the main elements included in the study)**

The main contents of this study include: (1) peripheral venous blood q-PCR determination: the process and methods of human blood specimen collection involved were as follows: patients with persistent atrial fibrillation (6 cases) and sinus rhythm (6 cases) were collected from the Cardiac Centre of Yunnan University Hospital. Subjects had their blood collected in the morning on an empty stomach, and brachial venous blood specimens were collected using a venous blood collector (EDTA anticoagulation; 10 ml) transported with ice packs to keep the temperature low, and promptly sent to the laboratory to be preserved at -80°C for the subsequent q-PCR test;

(2) Inclusion criteria: ① age > 18 years old, gender is not limited; ② electrocardiogram suggests atrial fibrillation, oesophageal cardiac ultrasound suggests that there is no thrombosis of the left auricle;③ clinical data records are complete. (Natural information is complete, and the recorded auxiliary examination items account for more than 1/2 of the items examined during the hospital stay). Exclusion criteria: ① age <18 years or >80 years; ② patients with acute coronary atherosclerotic heart disease, chronic pulmonary heart disease, infective endocarditis, hyperthyroidism, severe dysfunction of the liver and kidney, and malignant tumours were excluded.

If you agree to participate in this study, we will number each subject and create a medical record file. We will need to collect a specimen of your peripheral blood once during the course of the study, which will be sampled by a professional. For example, 10 ml of venous blood from your arm will be taken 1 time. Your blood sample will only be used for the clinical research of this project, and this study has been approved by the Medical Ethics Committee of Yunnan University Hospital, [Approval number: 2022200].

1. **What you need to do to participate in this study:**

If you agree to participate in this study, we will sign an informed consent form with you, number you, and establish a study file. Due to clinical diagnosis or treatment needs, you will be asked to (1). provide basic information about yourself, including gender, age, and ethnicity; provide the truth about your disease history and current physical condition; refrain from taking restricted medications, foods, etc; and tell the study doctor if you have participated in any other studies lately or what studies you are currently participating in. (2) take 10 ml of venous blood from your left/right upper arm within the first week of enrollment; and collect it once for peripheral blood q-PCR test. 10 ml of venous blood should be collected from your (left/right arm) within 1 week after enrolment, and the blood should be collected once for peripheral blood q-PCR measurement;

1. **Possible risks, discomforts of participating in this study and their management:**

If you agree to participate in this study, you will have 1 sample of peripheral venous blood drawn for q-PCR; the blood sample contains your genetic information and there may be a risk of (genetic) information disclosure. The process of venous blood collection may be painful and there may be transient redness, swelling and inflammation. Most of these adverse reactions are transient and reversible, but if you notice a gradual worsening of any of these reactions, or if any emergency situation arises, please inform your doctor promptly, who will provide you with prompt medical attention.

1. **Possible benefits of participating in this study:**

By participating in this study, you may not receive direct medical benefits. However, there will be some indirect medical benefits, including the fact that the tests performed on you will help to diagnose the disease, may provide the necessary advice for your treatment, your condition may improve, and may benefit patients with the same condition as yours.

1. **Costs you will incur to participate in this study:**

not have

1. **Confidentiality of personal information**

If you decide to participate in this study, your personal information about your participation in the study and during the study will be kept confidential. Your medical records (labs, etc.) will be kept intact at the hospital where you are seen. Your doctor will record the results of labs and other tests in your medical record. Any public reports of the results of this study will not disclose your personal identity. We will make every effort to protect the privacy of your personal medical information to the extent permitted by law.

The information and data obtained from this study will be published without disclosing any of your personal data.

1. **How to get more information**

You may ask any questions about this study at any time. Your doctor ______________ will leave you his/her phone number _________________ to be able to answer your questions. If you have any questions during the study, please ask them right away and your supervising doctor will do his/her best to answer them. Your doctor will keep you informed if there is any important new information during the course of the study that may affect your willingness to continue participating in the study.

If you have any questions related to your rights/interests, or if you would like to reflect the difficulties, dissatisfaction and concerns encountered during your participation in this study, or if you would like to provide comments and suggestions related to this study, please contact: Ethics Committee, Affiliated Hospital of Yunnan University; Contact Person: _____________; Contact Information: _____________.

1. **Whether to voluntarily opt in and out of the study**

Participation in the study is entirely up to you. You may refuse to participate in this study, or withdraw from the study at any time during the study, and this will not affect your relationship with your doctor, nor will it affect any loss of medical or other benefits to you.

If you agree to participate in this study, we sincerely hope that you will co-operate with us in completing the study, in the absence of any special reason. At the same time, during the course of the study, your doctor will have the right to discontinue your participation in the study at any time, with or without your consent, based on the principle of professional expertise and in your best interests.

If you are withdrawn from the study for any reason, you may be asked about your surgery. You may also be asked to have labs, imaging tests, physical exams, etc., if your doctor thinks they are needed.

1. **What should we do now?**

It is up to you (and your family) to decide whether or not to participate in this study. Before you make the decision to take part in the study, please ask your doctor as many questions as possible about it until you fully understand it.

Thank you for reading the above material. If you decide to take part in this study, please let your doctor know and he/she will organise everything for you regarding the study. Please keep this material with you.

**Informed consent**

**Informed consent signature page**

**Consent statement**

I have read the above description of this study and have had the opportunity to discuss and ask questions about this study with my doctor. All the questions I asked were answered to my satisfaction.

I am aware of the potential risks and benefits of participating in this study. I understand that participation in the study is voluntary and I confirm that I have had sufficient time to consider this and understand it:

- I can always ask my doctor for more information.
- I can withdraw from this study at any time without being discriminated against or treated unfairly, and my medical treatment and rights will not be affected.

I am equally aware that if I withdraw from the study midway through, especially if I am withdrawn from the study due to the product, I will inform my doctor of the change in my condition and complete the appropriate physical and physicochemical examinations, which will be very beneficial to myself and the study as a whole.

If I need to take any other form of treatment due to a change in my condition, I will seek my doctor's advice beforehand or tell him or her truthfully afterwards.

I will be given a signed and dated copy of the informed consent form. I also give permission for the records to be reviewed by the relevant national authorities, ethics committees and relevant researchers.

If this treatment infringes my rights, I can make a complaint to the Ethics Committee at ____________________________.

Finally, I have decided to agree to participate in this study, and by signing this informed consent form I am voluntarily participating in the study.

Subject's signature (in block letters): ____________________

ID number ____________________________________

Contact: ____________________________

Date: Wednesday, 30 June 2011, 00:00 hours

Signature of Legal Agent (when required) (in block letters): ____________ Relationship to Subject: _______________

ID number ____________________________________

Legal representative contact number: ____________________________

Date:

———————————————————————————————————————

I confirm that I have explained the details of this study to the patient, including his/her rights and the possible benefits and risks, and given him/her a copy of the signed informed consent form.

Doctor's signature (block letters):

Date:

Doctor's contact number: ____________________________
